# Supplementary material for: Dehydrogenation of Betacyanins in Heated Betalain-Rich Extracts of Red Beet (Beta vulgaris L.)
Source: MDPI journal article supplement (doi:10.3390/ijms23031245), 2022-01-23
Supplement: s1 [file s1]

# Dehydrogenation of Betacyanins in Heated Betalain-Rich Extracts of Red Beet (*Beta vulgaris* L.)

Katarzyna Sutor-Świeży<sup>1</sup>, Michał Antonik<sup>1</sup>, Justyna Proszek<sup>1</sup>, Boris Nemzer<sup>2,3</sup>, Zbigniew Pietrzkowski<sup>4</sup>, Łukasz Popenda<sup>5</sup>, Tomasz Świergosz<sup>1</sup> and Sławomir Wybraniec<sup>1,\*</sup>

- <sup>1</sup> Department C-1, Faculty of Chemical Engineering and Technology, Cracow University of Technology, ul. Warszawska 24, 31-155 Cracow, Poland; katarzyna.sutor@doktorant.pk.edu.pl (K.S.-Ś.); michal3antonik@gmail.com (M.A.); proszekjustyna@gmail.com (J.P.); tomasz.swiergosz@pk.edu.pl (T.Ś.);
- <sup>2</sup> Research and Analytical Center, VDF FutureCeuticals, Inc., 2692 N. State Rt. 1-17, Momence, IL 60954, USA; bnemzer@futureceuticals.com
- <sup>3</sup> Food Science & Human Nutrition, University of Illinois at Urbana-Champaign, 260 Bevier Hall, 905 S. Goodwin Ave., Urbana, IL 61801, USA
- <sup>4</sup> Discovery Research Lab, VDF FutureCeuticals, Inc., 23 Peters Canyon Rd., Irvine, CA 92606, USA; zb@futureceuticals.com
- <sup>5</sup> NanoBioMedical Centre, Adam Mickiewicz University Poznan, ul. Wszechnicy Piastowskiej 3, 61-614 Poznan, Poland; lukasz.popenda@amu.edu.pl
- \* Correspondence: slawomir.wybraniec@pk.edu.pl; Tel.: +48-12-628-3074; Fax: +48-12-628-2036

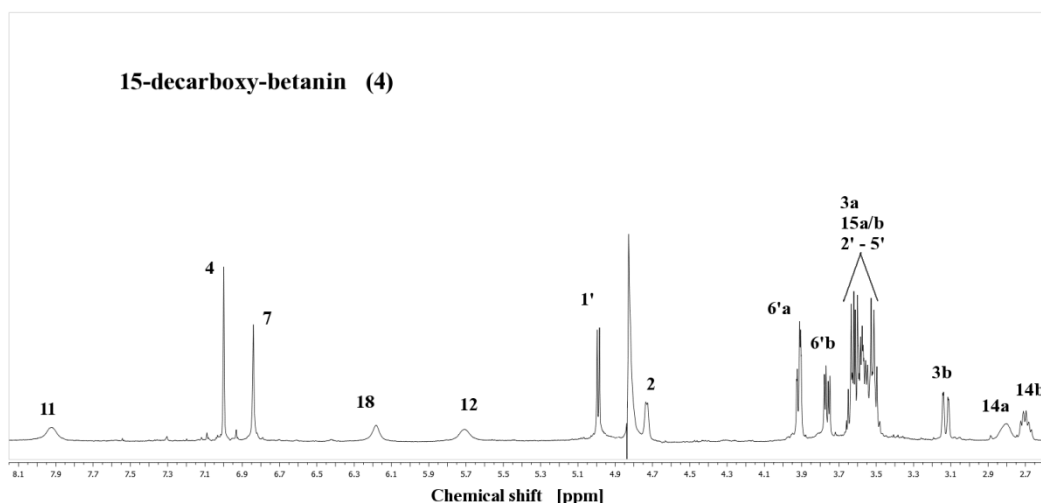

Figure S1. <sup>1</sup>H NMR spectrum of 15-decarboxy-betanin (D<sub>2</sub>O, 298 K).

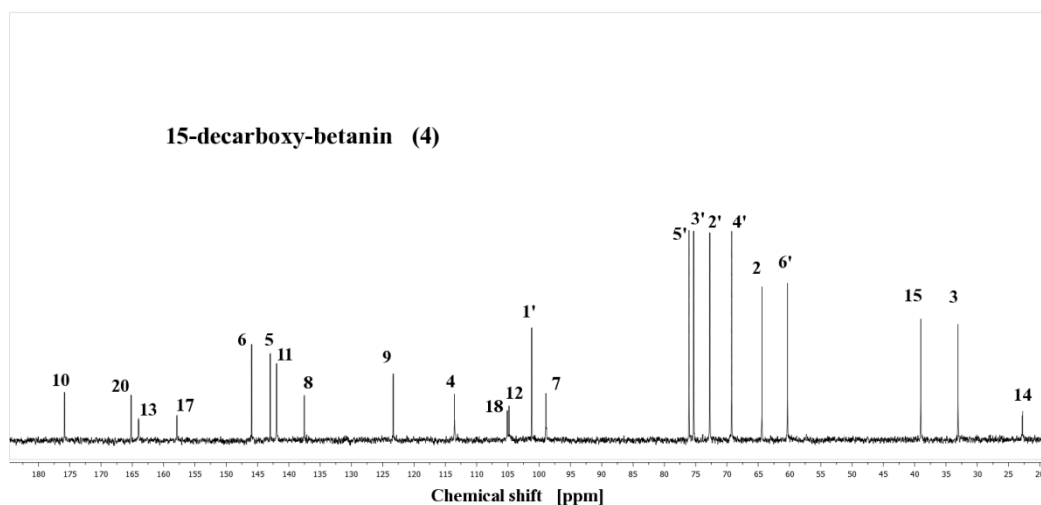

Figure S2. <sup>13</sup>C NMR spectrum of 15-decarboxy-betanin (D<sub>2</sub>O, 298 K).

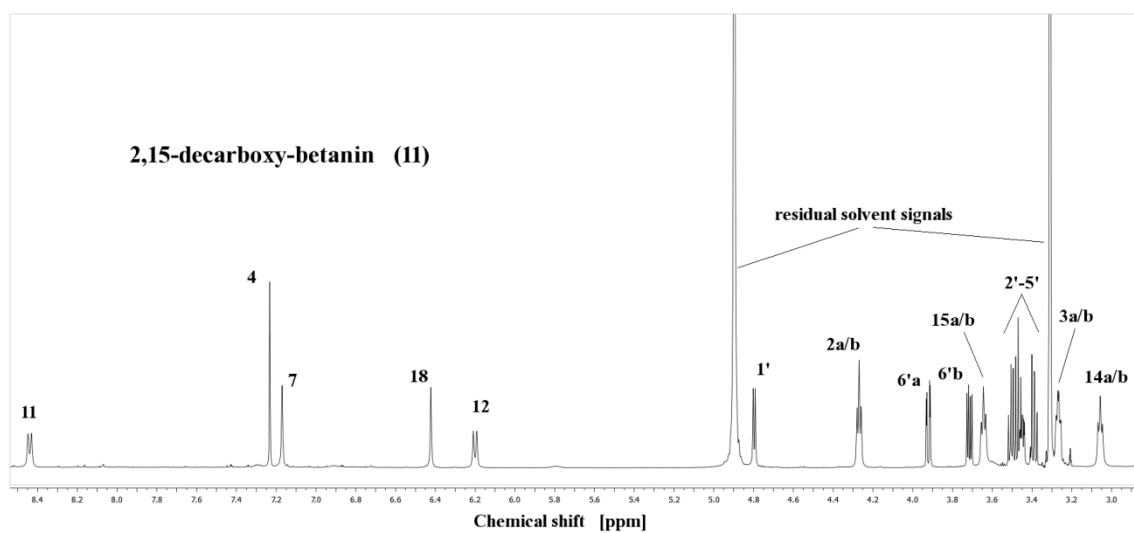

Figure S3.  $^1\text{H}$  NMR spectrum of 2,15-decarboxy-betanin ( $\text{CD}_3\text{OD}$ , 295 K).

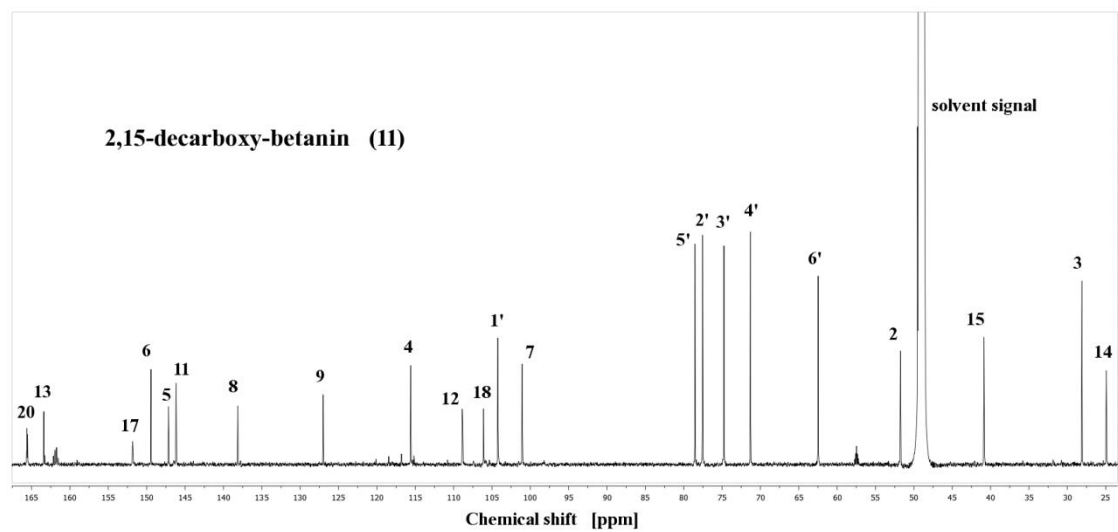

Figure S4.  $^{13}\text{C}$  NMR spectrum of 2,15-decarboxy-betanin ( $\text{CD}_3\text{OD}$ , 295 K).
